# Supplementary material
Source: PubMed Central journal article supplement (PMC4793105)

# Supplementary figure S1

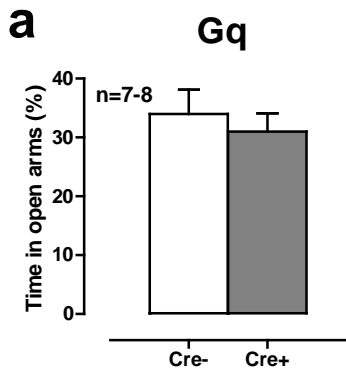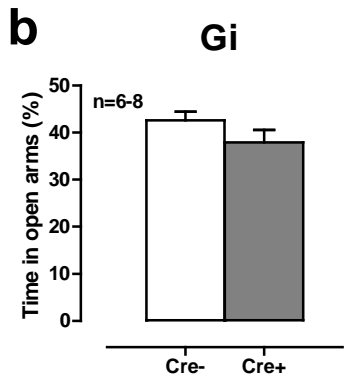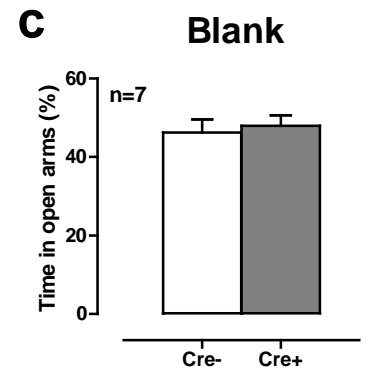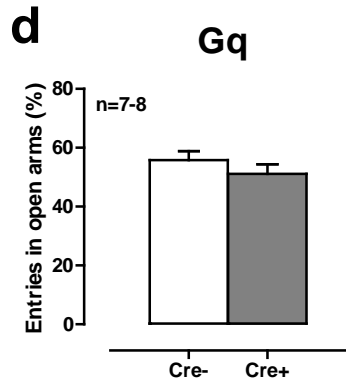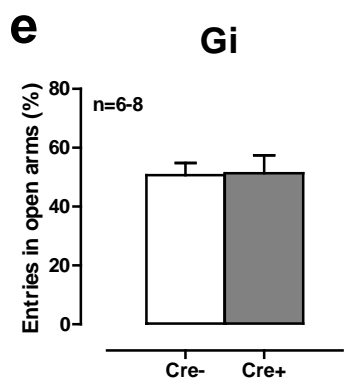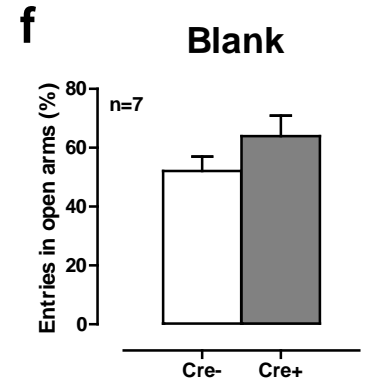

# Supplementary figure S2

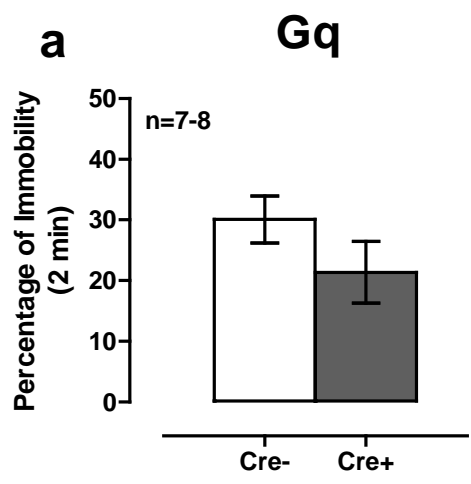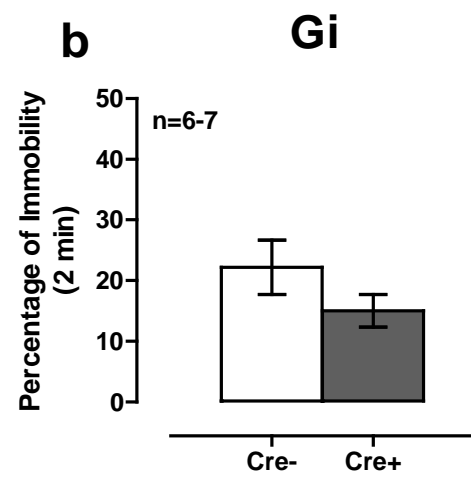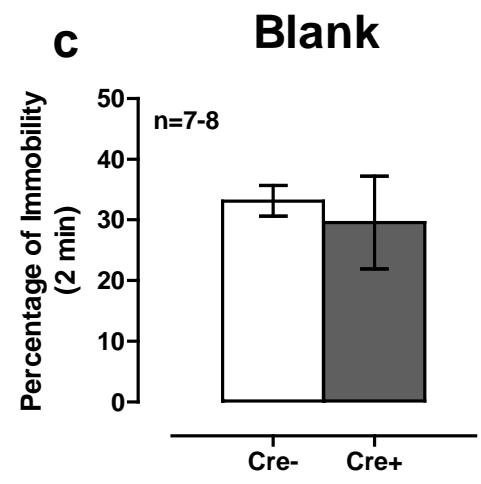

# Supplementary figure S3

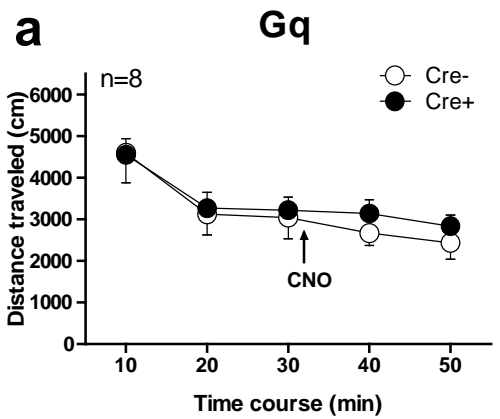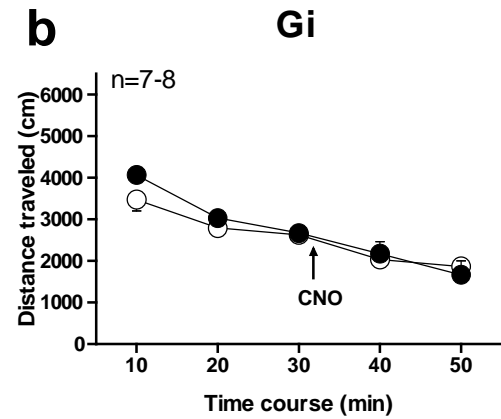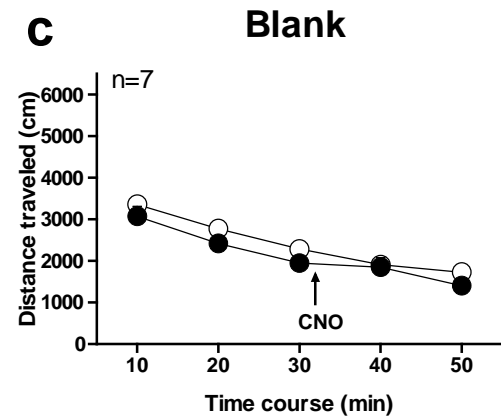

# Supplementary figure S4

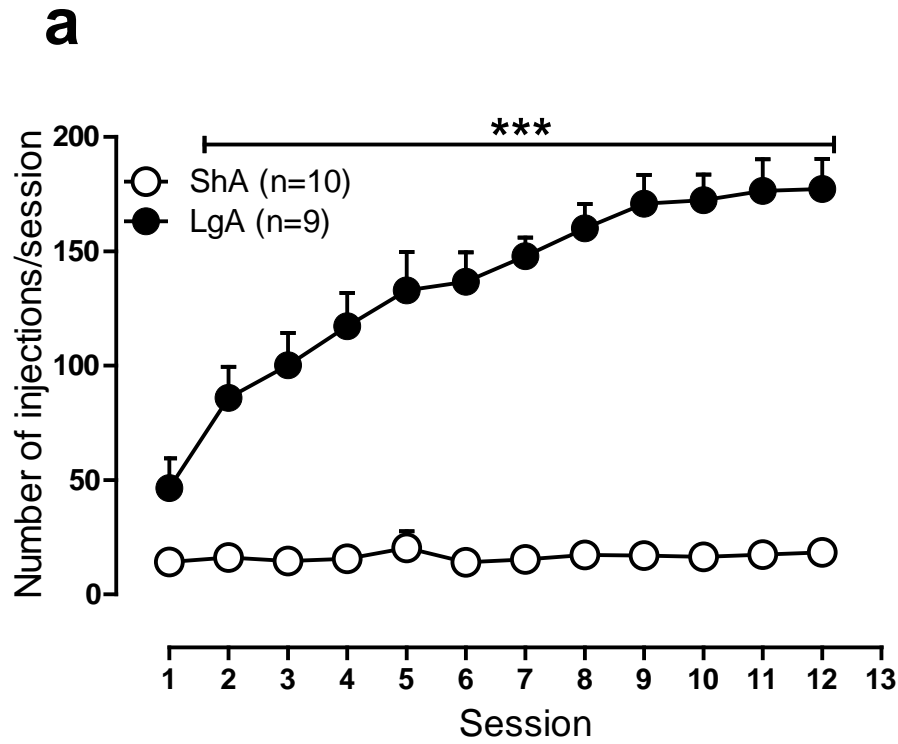

**c**

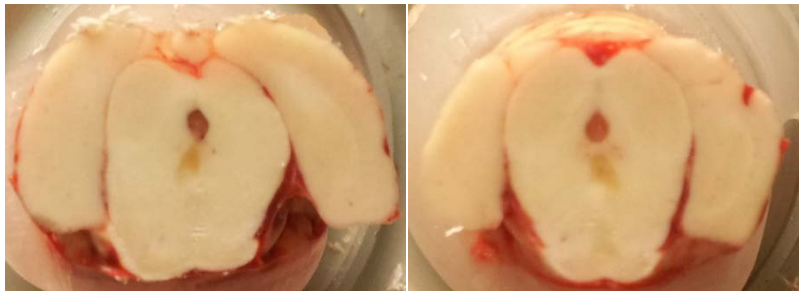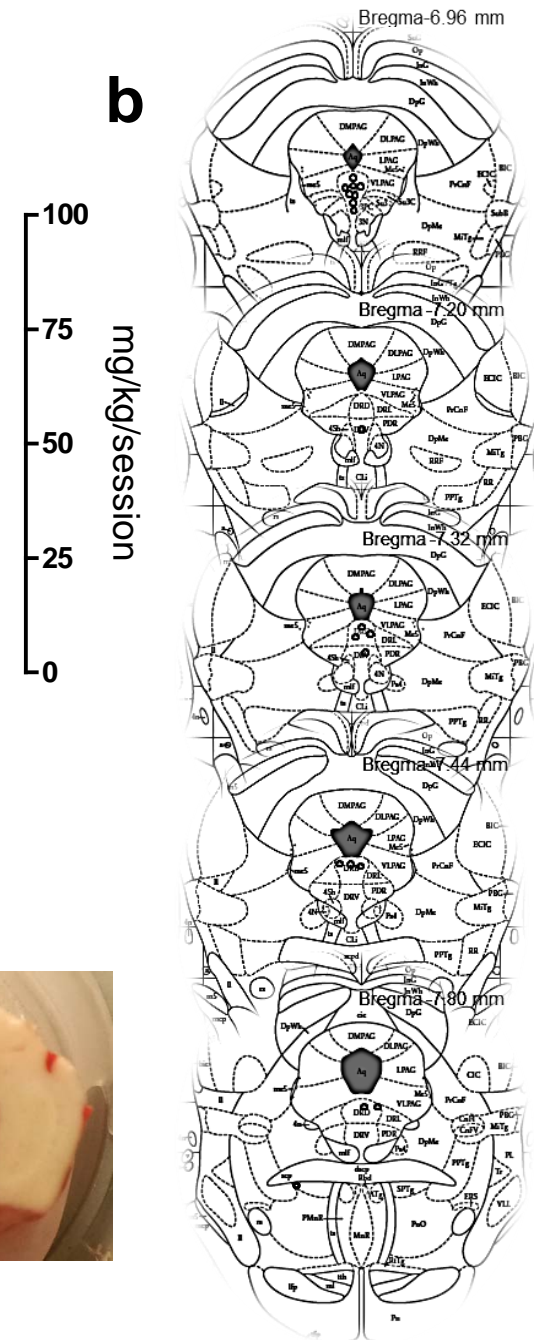

Supplement: npp2015268x2.pdf [file npp2015268x2.pdf]
